# Supplementary material
Source: PubMed Central journal article supplement (PMC10905632)
Supplement: sj-pdf-1-jcb-10.1177_0271678X231209069.pdf [file sj-pdf-1-jcb-10.1177_0271678X231209069.pdf]

## SUPPLEMENTAL TABLE

**Supplemental Table 1: Relevant data regarding the seven studies that used a TICI classification but were not retained for the present review (see Methods and Results)**

| First author, year                      | Number of patients included and TICI grade studied | TICI classification used   | Post-MT perfusion imaging timing/method | Definition of hypoperfusion                                                                             | Exclusion of ICA stenosis | Exclusion of intracranial reocclusion | Exclusion of areas with hemorrhage | N (%) of patients with hypoperfusion                           | Impact on clinical outcome                    |
|-----------------------------------------|----------------------------------------------------|----------------------------|-----------------------------------------|---------------------------------------------------------------------------------------------------------|---------------------------|---------------------------------------|------------------------------------|----------------------------------------------------------------|-----------------------------------------------|
| Marks, 2014 <sup>1</sup>                | 40/TICI2b-3                                        | Original TICI              | 12hr/PWI                                | <50% reduction of the pre-MT Tmax>6s lesion volume in the affected hemisphere                           | No                        | No                                    | No                                 | 6/40 (15%)                                                     | Not reported                                  |
| Albers, 2015 <sup>2</sup> / Mokin, 2017 | N not reported <sup>A</sup> /TICI 3                | Original TICI              | Mean 27hr/CTP                           | <90% reduction of the pre-MT Tmax>6s volume in the affected hemisphere                                  | No                        | No                                    | No                                 | 7%                                                             | Not reported                                  |
| Rubiera, 2020 <sup>3</sup>              | 94/mTICI 3                                         | mTICI not including TICI2c | ≤30min/CTP                              | Presence of post-MT Tmax≥6s in the affected hemisphere                                                  | No                        | Not specified                         | Not specified                      | 40/94 (42.5%)                                                  | Yes                                           |
| Bai, 2022 <sup>4</sup>                  | 44/mTICI2c-3 <sup>B</sup>                          | mTICI including TICI2c     | within 72hr/CTP                         | < 90% reduction of the pre-MT Tmax>6s volume in the affected hemisphere                                 | Not specified             | Yes                                   | No                                 | 10/44 (23%)                                                    | Negative impact (for mTICI2b-3)               |
| Rosso, 2022 <sup>5</sup>                | 42/TICI>2b                                         | Original TICI              | 24hr/MRI-ASL                            | ≥20% decrease in post-MT CBF compared to mirror region within the infarct and in the surrounding tissue | No <sup>D</sup>           | No <sup>E</sup>                       | No                                 | 8/42 (19%)                                                     | Analysis according to TICI grade not reported |
| Luby, 2022 <sup>6</sup>                 | 27 <sup>C</sup> /mTICI3                            | mTICI not including TICI2c | 24hr/PWI                                | Post-MT Tmax >6 s volume >10 mL in the affected hemisphere                                              | No                        | Yes                                   | No                                 | 2/27 (7%)                                                      | Analysis according to TICI grade not reported |
| Luby, 2023 <sup>7</sup>                 | 67/mTICI2b-3                                       | mTICI not including TICI2c | Within 6hr and again at 24-hour/ PWI    | Visually-assessed hypoperfused regions within the ischemic territory                                    | No                        | No                                    | No                                 | 41/67 (61%) at first assessment, 25/65 (38%) at 2nd assessment | Not reported                                  |

**Legend :** A: Number of patients not reported in the Albers et al SWIFT-PRIME study article, where it is just mentioned in the Methods section that 93% of the TIC13 patients who also had 27hr perfusion imaging had >90% reperfusion. However, in a subsequent sub-study of SWIFT PRIME by Mokin et al that included only the 29 patients with complete reperfusion, 23 patients were classified as TIC13. Thus, it can be assumed that the number of TIC13 patients in Albers et al was 25, of whom 23 (92%) had complete reperfusion; B: Hypoperfusion rates not reported separately for mTIC12c vs mTIC13 patients, and no response to emails requesting this data; C: 31 patients with TIC1 3 initially included, but 4 patients secondarily excluded to due reocclusion or distal emboli; D: 2 patients had ICA stenosis; E: 2 patients had reocclusion. **Abbreviations:** ASL: Arterial Spin Labeling; CTP: Computed Tomography Perfusion; DT: Delay Time; ICA: Internal Carotid Artery; MRI: Magnetic Resonance Imaging; MT: Mechanical Thrombectomy; PWI: Perfusion Weighted Imaging; TIC1: Thrombolysis in Cerebral Infarction (mTIC1: modified TIC1; eTIC1: expanded TIC1).

## REFERENCES

1. Marks MP, Lansberg MG, Mlynash M, et al. Angiographic outcome of endovascular stroke therapy correlated with MR findings, infarct growth, and clinical outcome in the DEFUSE 2 trial. *Int J Stroke* 2014; 9: 860-865. 20140331. DOI: 10.1111/ijvs.12271.
2. Albers GW, Goyal M, Jahan R, et al. Relationships Between Imaging Assessments and Outcomes in Solitaire With the Intention for Thrombectomy as Primary Endovascular Treatment for Acute Ischemic Stroke. *Stroke* 2015; 46: 2786-2794. 20150827. DOI: 10.1161/STROKEAHA.115.010710.
3. Rubiera M, Garcia-Tornel A, Olive-Gadea M, et al. Computed Tomography Perfusion After Thrombectomy: An Immediate Surrogate Marker of Outcome After Recanalization in Acute Stroke. *Stroke* 2020; 51: 1736-1742. 20200514. DOI: 10.1161/STROKEAHA.120.029212.
4. Bai X, Yu F, Tian Q, et al. Clinical Significance and Influencing Factors of Microvascular Tissue Reperfusion After Macrovascular Recanalization. *Transl Stroke Res* 2022 20220627. DOI: 10.1007/s12975-022-01053-0.
5. Rosso C, Belkacem S, Amor-Sahli M, et al. Persistent perfusion abnormalities at day 1 correspond to different clinical trajectories after stroke. *J Neurointerv Surg* 2022 20220614. DOI: 10.1136/neurintsurg-2022-018953.
6. Luby M, Merino JG, Davis R, et al. Association of Multiple Passes during Mechanical Thrombectomy with Incomplete Reperfusion and Lesion Growth. *Cerebrovasc Dis* 2022; 51: 394-402. 20211213. DOI: 10.1159/000519796.
7. Luby M, Hsia AW, Lomahan CA, et al. Post-ischemic hyperemia following endovascular therapy for acute stroke is associated with lesion growth. *J Cereb Blood Flow Metab* 2023: 271678X231155222. 20230207. DOI: 10.1177/0271678X231155222.
